# Supplementary material for: FDX1 serves as a prognostic biomarker and promotes glioma progression by regulating the immune response
Source: publisher site journal article supplement (doi:10.18632/aging.204772), 2023-06-10
Supplement: Supplementary file [file aging-v15i11-204772-supplementary-material-SD1.pdf]

**SUPPLEMENTARY FIGURES**

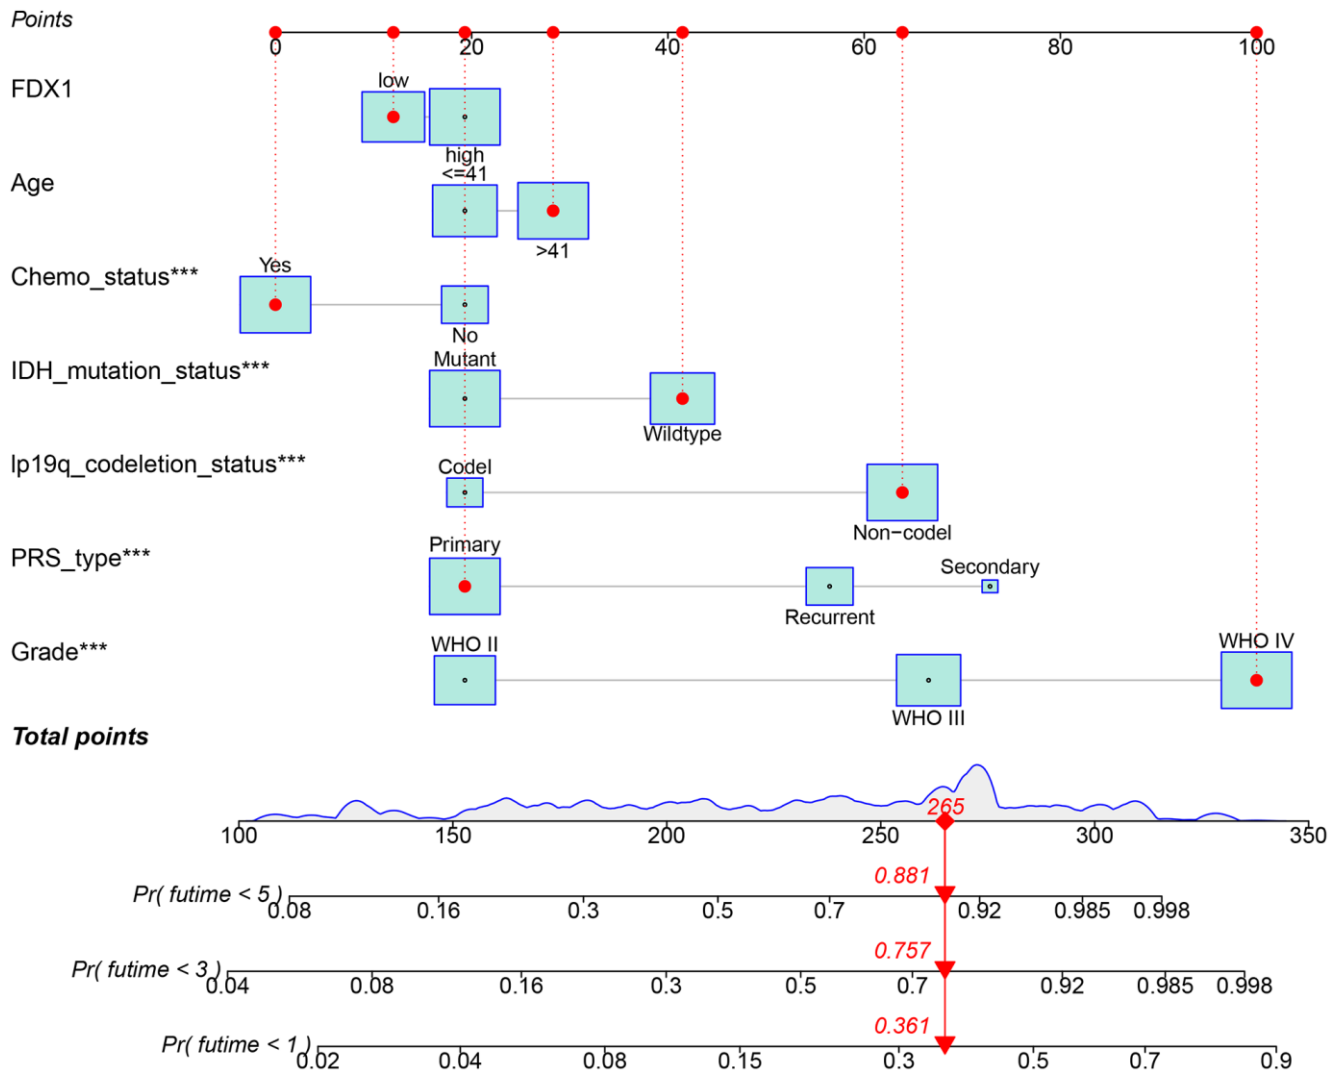

**Supplementary Figure 1. Nomogram of FDX1 and clinical parameters for predicting prognosis of glioma patients.**

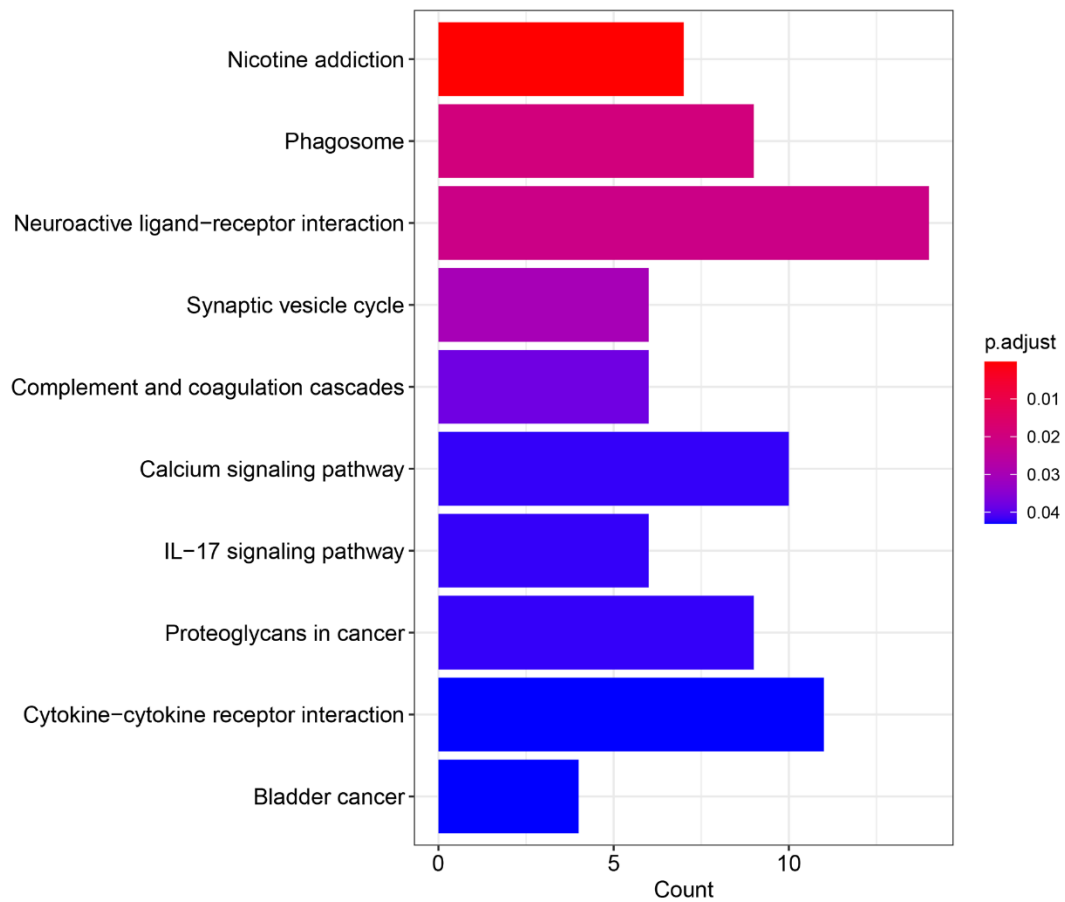

**Supplementary Figure 2. KEGG pathway analysis for differentially expressed genes between high- and low-FDX1 expression groups.**



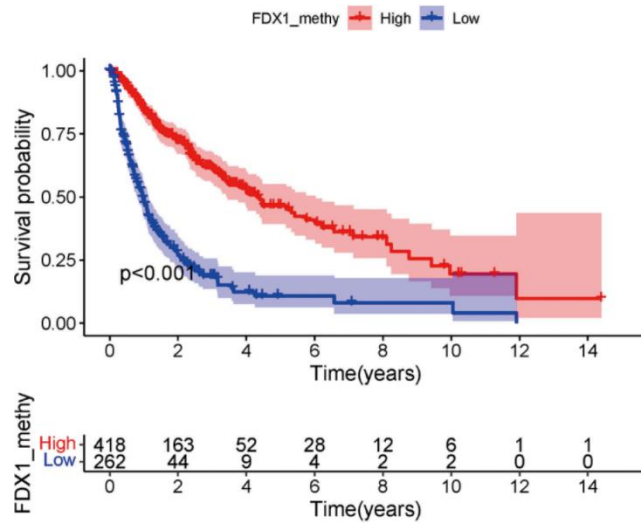

Supplementary Figure 4. Correlation of FDX1 methylation level with clinical prognosis.
